# Supplementary material
Source: PubMed Central journal article supplement (PMC7958241)
Supplement: pnas.2017431118.sapp.pdf [file pnas.2017431118.sapp.pdf]

## SI Appendix

### Supplementary Figures

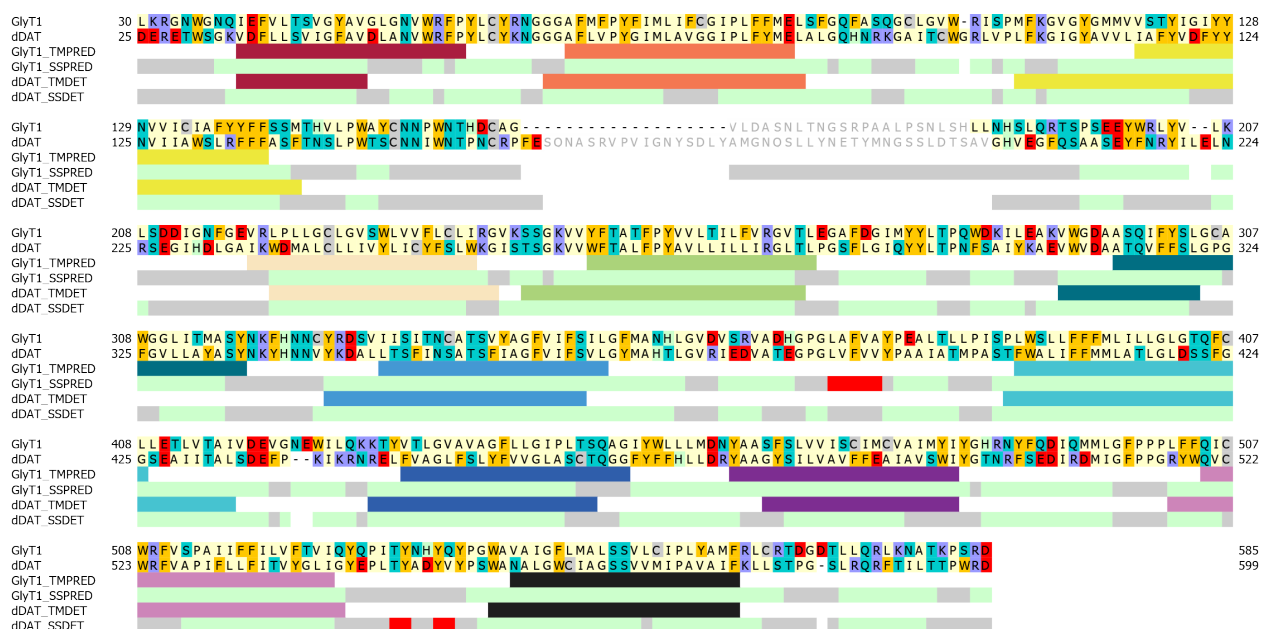

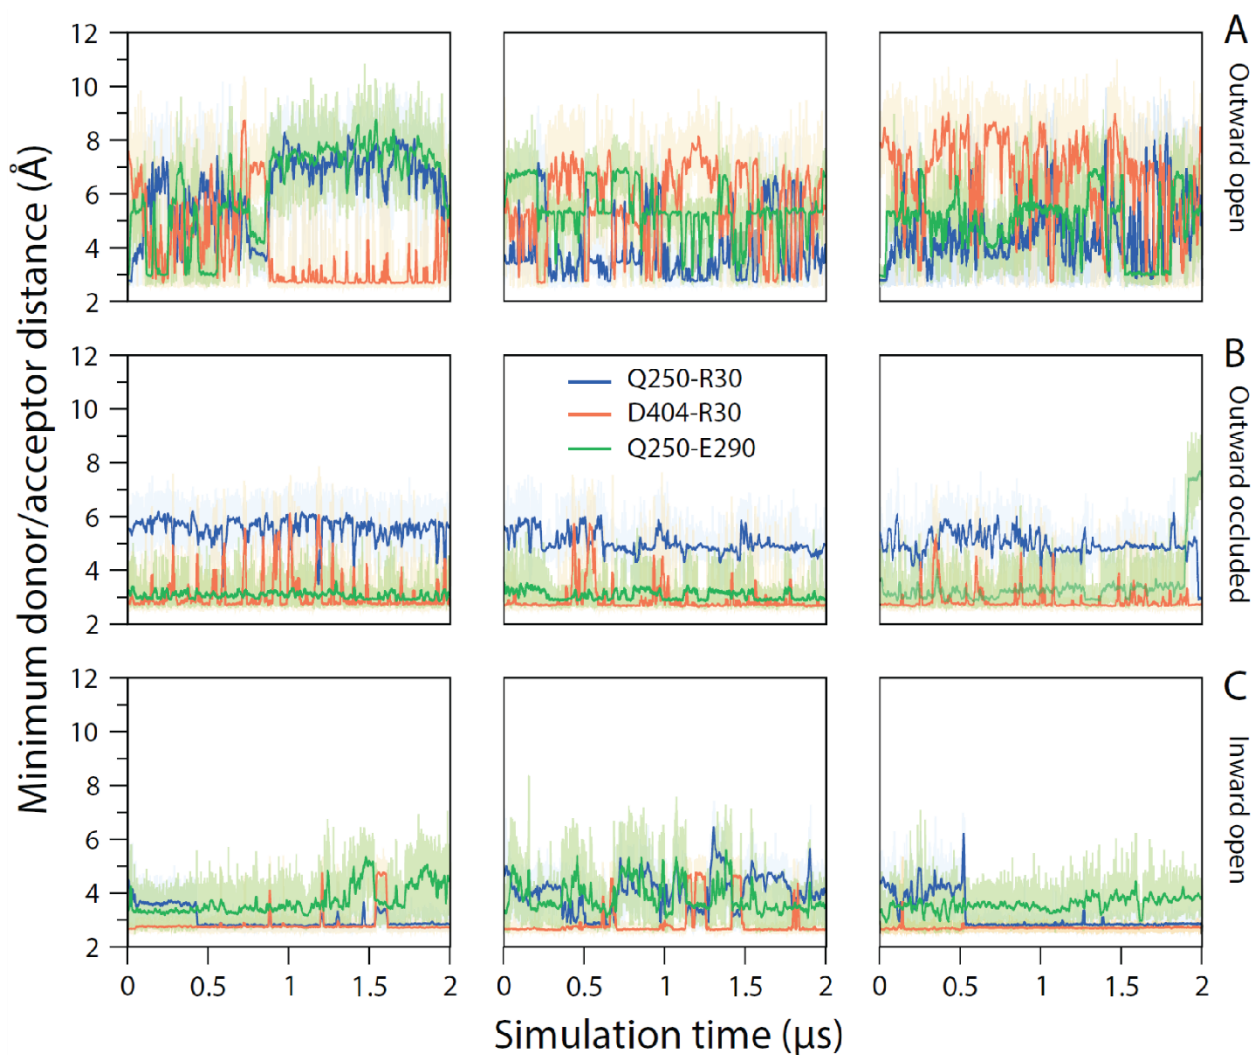

**Figure S2. Time-course of the interactions between residues in the extracellular pathway and the chloride binding site during MD simulations of LeuT.** Data represent distances between the closest donor and acceptor atom of Arg30 with Gln250 (blue), with Asp404 (orange), and between Gln250 and Glu290 (green). Simulations are for LeuT in (A) outward-open apo (3TT1), (B) outward-occluded holo (3F48), and (C) inward-open apo (3TT3) conformations. Each simulation was repeated three times (columns).
